# Supplementary material
Source: Springer Nature journal article supplement (https://www.springermedizin.de/resource/supplementary/13049_2013_633_MOESM1_ESM.pdf/9666898)

**mobile equipment**

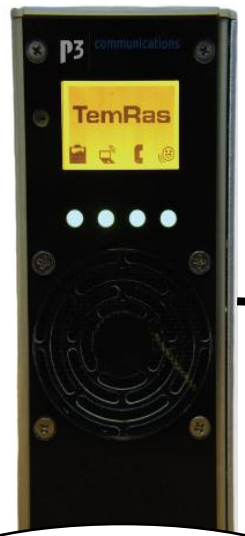

**peeq-Box**

**ceiling video camera**

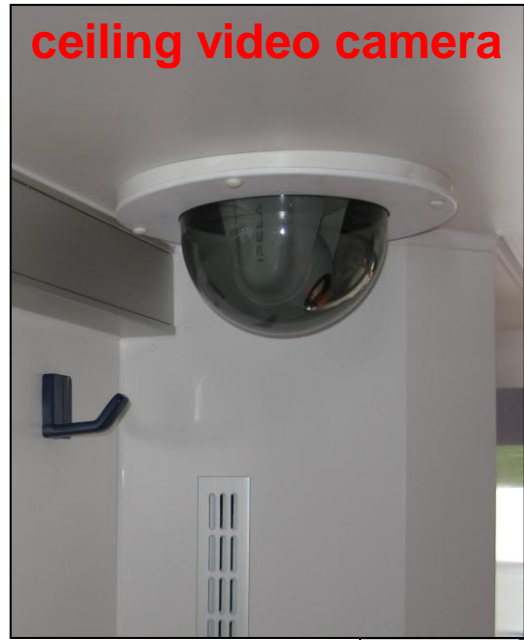

**in-vehicle equipment**

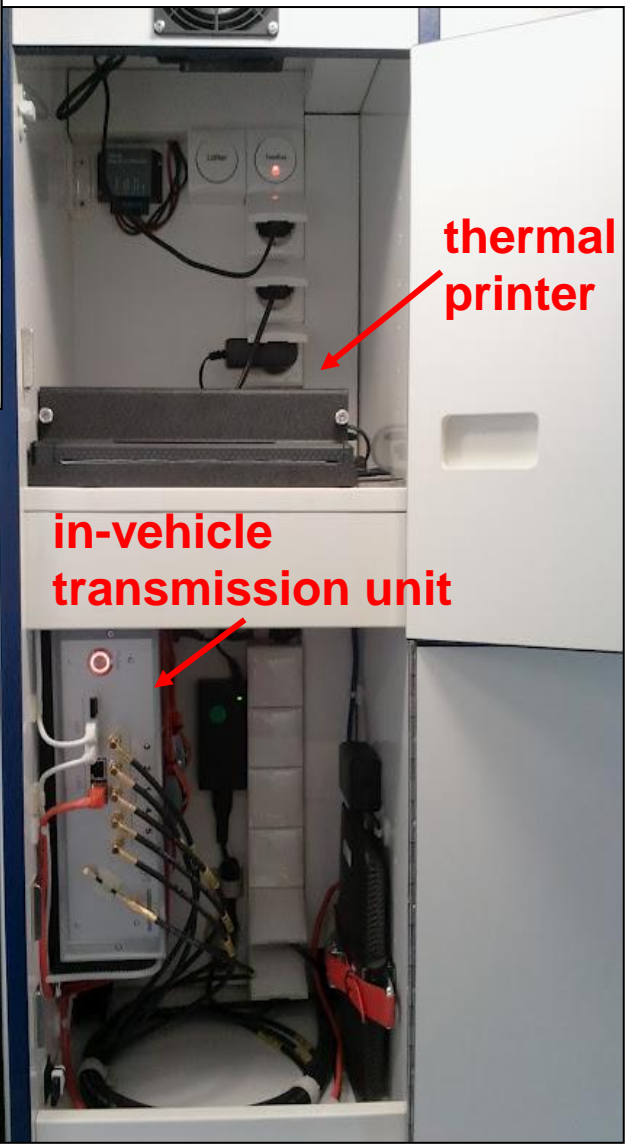

**thermal printer**

**in-vehicle transmission unit**

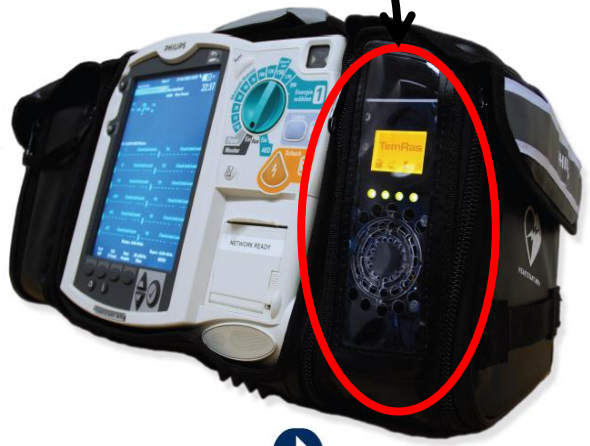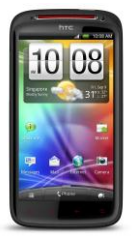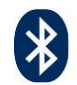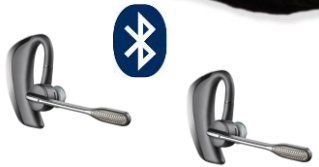

Supplement: MOESM1 [file 9666898]
